# Size- and stage-dependence in cause-specific mortality of migratory brown trout

Chloé R. Nater<sup>\*a</sup>, Yngvild Vindenes<sup>a</sup>, Per Aass<sup>b</sup>, Diana Cole<sup>c</sup>,  
Øystein Langangen<sup>a</sup>, S. Jannicke Moe<sup>d</sup>, Atle Rustadbakken<sup>e</sup>, Daniel  
Turek<sup>f</sup>, L. Asbjørn Vøllestad<sup>a</sup> and Torbjørn Ergon<sup>a</sup>

<sup>a</sup>Centre for Ecological and Evolutionary Synthesis (CEES),  
Department of Biosciences, University of Oslo, Oslo, Norway

<sup>b</sup>Zoological Museum, The Natural History Museums and Botanical  
Garden, University of Oslo, Oslo, Norway

<sup>c</sup>School of Mathematics, Statistics and Actuarial Science, University  
of Kent, Canterbury, England

<sup>d</sup>Norwegian Institute for Water Research (NIVA), Oslo, Norway

<sup>e</sup>Norconsult AS, Hamar, Norway

<sup>f</sup>Department of Mathematics and Statistics, Williams College,  
Williamstown, Massachusetts, United States

Running headline: Cause- and size-specific mortality

---

\*c.r.nater@ibv.uio.no

## 1 Abstract

- 2 1. Evidence-based management of natural populations under strong human in-  
3 fluence frequently requires not only estimates of survival but also knowledge  
4 about how much mortality is due to anthropogenic versus natural causes.  
5 This is the case particularly when individuals vary in their vulnerability to  
6 different causes of mortality due to traits, life-history stages, or locations.
- 7 2. Here, we estimated harvest and background (other cause) mortality of a  
8 landlocked migratory salmonid over half a century. In doing so, we quanti-  
9 fied among-individual variation in vulnerability to cause-specific mortality  
10 resulting from differences in body size and spawning location relative to a  
11 hydropower dam.
- 12 3. We constructed a multistate mark-recapture model to estimate harvest and  
13 background mortality hazard rates as functions of a discrete state (spawning  
14 location) and an individual time-varying covariate (body size). We further  
15 accounted for among-year variation in mortality and migratory behavior and  
16 fit the model to a unique 50-year time-series of mark-recapture-recovery data  
17 on brown trout (*Salmo trutta*) in Norway.
- 18 4. Harvest mortality was highest for intermediate-sized trout, and outweighed  
19 background mortality for most of the observed size range. Background mor-  
20 tality decreased with body size for trout spawning below the dam and in-  
21 creased for those spawning above. All vital rates varied substantially over  
22 time, but a trend was evident only in estimates of fishers' reporting rate,  
23 which decreased from over 50% to less than 10% throughout the study pe-

24 rioid.

25 5. We highlight the importance of body size for cause-specific mortality and  
26 demonstrate how this can be estimated using a novel hazard rate parameter-  
27 isation for mark-recapture models. Our approach allows estimating effects of  
28 individual traits and environment on cause-specific mortality without con-  
29 founding, and provides an intuitive way to estimate temporal patterns within  
30 and correlation among different mortality sources.

## 31 **Keywords**

32 Bayesian statistics, dam, harvesting, hazard rate, mark-recapture, mortality, NIM-  
33 BLE, trout.

## 34 **Introduction**

35 Population dynamics – particularly of long-lived species – are often highly sensi-  
36 tive to changes in mortality (Sæther and Bakke 2000). Mortality can have a wide  
37 variety of causes (e.g. starvation, predation, disease, harvest), and vulnerability to  
38 cause-specific mortality may depend on individual factors such as age or life stage  
39 (Ronget et al. 2017). As a consequence, population-level responses to changes in  
40 mortality may vary greatly depending on the underlying cause, and disentangling  
41 different causes of mortality may provide insights crucial for population manage-  
42 ment and conservation (Williams et al. 2002). This is particularly important in  
43 populations where a significant portion of mortality is linked to human activity;  
44 in such cases, knowledge about the relative impact of human-induced mortality

45 and its effects on other mortality sources is crucial for developing sustainable and  
46 successful management strategies (Hilborn and Walters 2013, Koons et al. 2014).

47 Studies of marked individuals constitute a highly valuable source of demo-  
48 graphic data for wild animal populations and are essential for estimating survival,  
49 as well as cause-specific mortality. The recovery of a dead marked animal often pro-  
50 vides information on the cause of death. However, unless animals are marked with  
51 radio- or satellite transmitters, most dead individuals will not be found, and this  
52 imperfect detection needs to be accounted for when estimating mortality parame-  
53 ters. Moreover, when considering multiple mortality causes, detection probability  
54 frequently depends on the cause of mortality, and some causes of mortality may  
55 not be observable at all. This is usually the case for natural mortality when dead  
56 recoveries are exclusively based on the reports of hunters or fishers (e.g. Servanty  
57 et al. 2010, Koons et al. 2014).

58 Schaub and Pradel (2004) developed a multistate mark-recapture-recovery frame-  
59 work that allows separately estimating mortality from different causes while ac-  
60 counting for cause-dependent detection probabilities. Specifically, cause-specific  
61 mortalities are estimated as transitions from an “alive” state to several “dead from  
62 cause of interest” states. When this framework is extended to also include mul-  
63 tiple “alive” states, it becomes possible to estimate differences in vulnerability to  
64 cause-specific mortality depending on, for example, an individual’s life-stage (e.g.  
65 juveniles vs. adults, Schaub and Pradel 2004) or location (Fernández-Chacón et al.  
66 2015). Such group-level differences in mortality can be tremendous and accounting  
67 for them is crucial for modelling population dynamics (Ronget et al. 2017). How-  
68 ever, in addition to that, vital rates and population dynamics are often strongly  
69 affected by individual differences in continuous, dynamic traits such as body size

70 (De Roos et al. 2003, Vindenes and Langangen 2015). Particularly in species that  
71 are harvested and/or have indeterminate growth (e.g. fish species), cause-specific  
72 mortality is expected to depend strongly on body size. Fernández-Chacón et al.  
73 (2017) demonstrated this by estimating cause-specific mortalities for different sizes  
74 of Atlantic cod (*Gadus morhua*). However, they did so by lumping individuals  
75 into either of two size classes (“small” or “large”), thus foregoing the possibility of  
76 investigating the continuous relationship between body size and mortality from  
77 different causes. Knowledge about the relationships between continuous traits and  
78 vital rates is, however, invaluable for studying population-level trait dynamics (e.g.  
79 using integral projection models Ellner and Rees 2006).

80 Migratory salmonid fishes are extensively studied due to their ecological, cul-  
81 tural and economical value (Drenner et al. 2012). Nonetheless, studies at the pop-  
82 ulation level are frequently hindered by a lack of knowledge about the mortality  
83 of adults residing in the sea or large lakes (Piccolo et al. 2012). Many salmonid  
84 populations are heavily impacted by human activity, not only in the form of har-  
85 vesting, but also through pollution, fish farming, habitat fragmentation, and hydro-  
86 electrical power production (dams) in rivers (Aas et al. 2010), making the study  
87 of population-level consequences of such impacts a priority.

88 Here we study a population of migratory brown trout (*Salmo trutta*, hereafter  
89 “trout”) which inhabits a river-lake system in Eastern Norway and has been a pop-  
90 ular target for fishing for decades due to its large body size. The spawning river is  
91 dammed, and trout migrating to spawning grounds above the dam face additional  
92 risks linked to dam passage on their up- and downriver migrations. Trout spawning  
93 below the dam, on the other hand, completely avoid these risks but may, in turn,  
94 incur costs related to poor river condition and crowding on the spawning grounds

95 below the dam. Mortality risks are thus likely associated with spawning location  
96 in addition to individual body size and environmental conditions. To account for  
97 this heterogeneity, we re-parameterized mark-recapture models for cause-specific  
98 mortality in terms of mortality hazard rates (Cox 1972, Quinn 2003, Ergon et al.  
99 2018) and extended the framework to include a continuous individual- and time-  
100 varying trait (body size) as a predictor of vulnerability within groups of individuals  
101 with different migration patterns. Fitting the resulting model to a unique 50-year  
102 time-series of recaptures and recoveries of marked trout enabled us to investigate  
103 the effects of individual (size, spawning location, origin) and environmental (river  
104 discharge) factors on, and temporal variation in, several key vital rates: the vul-  
105 nerability of adult trout to mortality due to harvest, dam passage, and natural  
106 causes, and the probability of using a fish ladder within the dam to access upriver  
107 spawning areas.

## 108 **Materials and methods**

### 109 **STUDY SYSTEM AND DATA**

110 The studied population of landlocked migratory (potamodromous) brown trout  
111 inhabits the lake Mjøsa and its main inlet river, Gudbrandsdalslågen, in Eastern  
112 Norway. Eggs are deposited in the river in fall and develop over winter. After  
113 hatching in spring, juvenile trout remain in the river for an average of 4 years  
114 before smolting and migrating to the lake. They typically mature after 2 - 3 years  
115 of piscivorous diet and fast growth in the lake, and from that point on migrate up  
116 the river to spawn every other year (usually in August/September, Figure 1). See  
117 Aass et al. (1989) for a more detailed description of the life history. The population

118 consists of wild-hatched trout and stocked (first-generation hatchery-reared) trout,  
119 which are recognizable by their clipped adipose fin. Stocked trout are released into  
120 the river and lake as smolts but then follow the same general life history as wild-  
121 hatched individuals (Aass 1993).

122 Shortly after the river was dammed in the 1960's, a fish ladder was installed to  
123 restore connectivity to the spawning grounds above the dam. Depending on body  
124 size and hydrological conditions, trout may either pass the dam by using the fish  
125 ladder on their upriver spawning migration, or reproduce below the dam (Aass  
126 et al. 1989, Haugen et al. 2008). Trout spawning above the dam have to pass the  
127 dam again on their return migration to the lake (in October/November or in the  
128 following spring). Since the fish ladder cannot be used for moving downriver, these  
129 trout must pass either through the floodgates or the turbine shaft. Whether or not  
130 an individual uses the fish ladder thus determines not only its spawning location,  
131 but also the potential risks it encounters during the return to the lake.

132 From 1966 to 2016 a trap was operated within the fish ladder, allowing for  
133 all trout passing the ladder to be captured, measured, and individually marked.  
134 Thus, all adult trout were marked with Carlin tags (Carlin 1955) when they used  
135 the fish ladder on an upriver spawning migration for the first time, and could be  
136 recaptured on subsequent spawning migrations given that they passed the ladder  
137 again. Subsequent spawning runs occur two years later for the majority of fish  
138 (98.5%), which adhered to a strictly biennial spawning cycle (Figure 1). Over  
139 the 50-year time period, 13,975 adult trout were marked and 2,106 of these were  
140 recaptured in the ladder later. Since the population has been exposed to fishing  
141 over the entire time period, an additional 2,322 marked trout were reported dead by  
142 fishers. For more details on the marking scheme, sampling protocol, and resulting

143 data from the mark-recapture-recovery study, see Moe et al. (2019).

144 In the present study we performed mark-recapture analyses over intervals of  
145 two years, as estimating parameters for spawning and non-spawning years sepa-  
146 rately was not possible (due to trout being unobservable in non-spawning years,  
147 Figure 1). We thus summarised the data into individual capture histories  $y_{i,t}$ , in  
148 which each time index  $t$  corresponds to a two-year time step (interval from current  
149 spawning year to next spawning year). For each time step, we coded three types  
150 of observations: 1 = alive and captured in the ladder, 2 = dead from harvest and  
151 reported, and 3 = not observed. We set  $y_{i,t} = 1$  when an individual was captured in  
152 the fish ladder in any month during time interval  $t$ . Harvest of trout happens year-  
153 round (Figure S1.1) and if an individual was harvested and reported at any point  
154 during interval  $t$  we set  $y_{i,t} = 2$ , unless (a) the individual had also been caught  
155 in the fish ladder during interval  $t$  or (b) the harvest happened after August of  
156 the second year within the interval  $t$ . If either (a) or (b) was the case, we moved  
157 the harvest observation to the next interval such that  $y_{i,t+1} = 2$ . Furthermore, we  
158 excluded all individuals that did not follow a strictly biennial spawning cycle (1.5%  
159 of all individuals), did not have a single size measurement taken (<1%), or were of  
160 unknown origin (wild vs. stocked, <1%). The analyses presented here are based on  
161 the remaining 13,003 capture histories containing 1,498 trap recaptures and 2,252  
162 harvest recoveries from both wild-hatched and stocked (hatchery-reared) trout.



## 163 MODEL FORMULATION

### 164 General model structure

165 We analysed the trout mark-recapture-recovery data in a multistate mark-recapture  
166 framework (Lebreton et al. 1999) with both “alive” and cause-specific “newly dead”  
167 states (Figure 2). Since trout are marked in the fish ladder while passing the dam  
168 on an upriver spawning migration, all individuals are in state 1, “spawning upriver”,  
169 at the start of their first 2-year time interval. State 1 individuals  $i$  may survive  
170 from the current ( $t$ ) to the next ( $t + 1$ ) spawning migration with probability  $S_{1,i,t}$   
171 and will then either use the fish ladder (probability  $p_{i,t+1}$ ) to spawn above the dam  
172 again, or remain below the dam for spawning (probability  $1 - p_{i,t+1}$ ). Individuals  
173 using the ladder and thus remaining in state 1 are guaranteed to be observed,  
174 while individuals not using the ladder transition to state 2, “spawning downriver”,  
175 and are unobservable. Since spawning location may have a considerable effect on  
176 mortality, state 2 individuals have their own survival probability  $S_{2,i,t}$ , but we as-  
177 sume that their probability of using the fish ladder during the next spawning run  
178 ( $p_{i,t+1}$ ) does not differ from that of state 1 individuals.

179 When deaths of marked individuals can be observed and attributed to a cause,  
180 multistate mark-recapture models can be used to estimate the probability of dying  
181 from cause X as the transition from an “alive” state to “newly dead from cause  
182 X” state (Schaub and Pradel 2004, Servanty et al. 2010). For the studied trout  
183 population, deaths due to harvest are clearly distinguishable from deaths due to  
184 other causes since fishers may report catching marked trout. Extending the model  
185 with the state “newly dead from harvest” (state 3) thus allows us to include the  
186 probability of an individual  $i$  in state  $n$  ( $n = 1$  for above-dam spawners,  $n = 2$  for

187 below-dam spawners) dying due to harvest,  $\Psi_{n,i,t}^H$ , and dying due to other causes  
 188  $\Psi_{n,i,t}^O$  over the time interval  $t$  to  $t + 1$ . Individuals that have recently died due to  
 189 harvest (state 3) may be reported by fishers with reporting rate  $r_t$ . Individuals  
 190 that die due to other causes are not observable and therefore transition directly to  
 191 the “dead” state (state 4; see Figure 2).

192 The resulting multistate model for the trout mark-recapture-recovery data can  
 193 be expressed with the following state transition matrix and associated observation  
 194 probabilities:

|                      |   | <i>state</i> ( $t + 1$ ) |                            |                  |                  | <i>obs.</i> ( $t$ ) |
|----------------------|---|--------------------------|----------------------------|------------------|------------------|---------------------|
|                      |   | 1                        | 2                          | 3                | 4                |                     |
| <i>state</i> ( $t$ ) | 1 | $S_{1,i,t}p_{i,t+1}$     | $S_{1,i,t}(1 - p_{i,t+1})$ | $\Psi_{1,i,t}^H$ | $\Psi_{1,i,t}^O$ | 1                   |
|                      | 2 | $S_{2,i,t}p_{i,t+1}$     | $S_{2,i,t}(1 - p_{i,t+1})$ | $\Psi_{2,i,t}^H$ | $\Psi_{2,i,t}^O$ | 0                   |
|                      | 3 | 0                        | 0                          | 0                | 1                | $r_t$               |
|                      | 4 | 0                        | 0                          | 0                | 1                | 0                   |

### 195 Parameterisation by mortality hazard rates

196 Different cause-specific mortality probabilities ( $\Psi$ ) are not independent of one an-  
 197 other; if a certain cause of mortality becomes more prevalent (e.g. due to some  
 198 event or change in the environment), not only will the probability of dying from  
 199 that cause increase, but the probability of dying from any other cause will decrease  
 200 at the same time. This confounding complicates inference (e.g. Cooch et al. 2014),  
 201 but Ergon et al. (2018) have recently re-emphasized that this can be avoided – also  
 202 in the context of discrete-time mark-recapture analyses – by parameterising with

203 mortality hazard rates instead of probabilities (Cox 1972, Quinn 2003). Assuming  
204 that the intensities of mortality from different causes remain proportional within  
205 time intervals, we can define the survival- and mortality probabilities in the trout  
206 model using harvest ( $m^H$ ) and other-cause (hereafter “background”) mortality haz-  
207 ard rates ( $m^O$ ):

$$S_{n,i,t} = \exp(-(m_{n,i,t}^H + m_{n,i,t}^O))$$
$$\Psi_{n,i,t}^H = (1 - S_{n,i,t}) \frac{m_{n,i,t}^H}{m_{n,i,t}^H + m_{n,i,t}^O}$$
$$\Psi_{n,i,t}^O = (1 - S_{n,i,t}) \frac{m_{n,i,t}^O}{m_{n,i,t}^H + m_{n,i,t}^O}$$

208 (see derivation in Ergon et al. (2018))

209 In the present implementation, we further constrained harvest mortality to be  
210 the same for trout spawning above and below the dam:  $m_{1,i,t}^H = m_{2,i,t}^H = m_{i,t}^H$ .  
211 This constraint was necessary to obtain an identifiable model, but also biologically  
212 reasonable because most harvest happens in the lake and fishing in the river is  
213 restricted during the spawning season (which is also short relative to the two-year  
214 interval of analysis).

## 215 MODEL IMPLEMENTATION

### 216 Individual and temporal variation in vital rate parameters

217 Body size and hydrological conditions are often key determinants of vital rate  
218 variation in freshwater fish, including our study population (e.g. Carlson et al. 2008,  
219 Letcher et al. 2015, Haugen et al. 2008). We thus used individual body size (length;  
220 mm) at the beginning of the time-interval and average river discharge during the

221 relevant season as covariates for mortality and ladder usage in our model. We  
222 further accounted for potential effects of hatchery origin and additional among-year  
223 variation in all parameters  $x$  using intercept offsets for stocked individuals ( $\beta_{stock}^x$ )  
224 and temporal random effects ( $\epsilon_t^x$ ), respectively. Random effects on all parameters  
225 were assumed to be independently normally distributed on the link scale (but  
226 see Supporting Information (SI) S6 for a model extension with correlated random  
227 effects).

228 Harvest in our study system has been done mostly using fishing rods or gillnets;  
229 the selectivity of the former is often positively correlated with body size (Lewin  
230 et al. 2006) while the latter typically have bell-shaped selectivity curves (Hamley  
231 1975). Since we here pooled harvest by all gear types, we modelled linear and  
232 quadratic effects of size on harvest hazard rate on the log-scale:

$$\log(m_{i,t}^H) = \log(\mu^H) + \beta_{stock}^H * origin_i + \beta_S^H * size_{i,t} + \beta_{SS}^H * size_{i,t}^2 + \epsilon_t^H$$

233 where  $\mu^H$  is the median harvest hazard rate,  $\beta_S^H$  and  $\beta_{SS}^H$  are slope parameters  
234 for linear and quadratic size effects respectively.  $size_{i,t}$  is the individual length at  
235 spawning and  $origin_i$  is a binary variable taking values of 1 for stocked fish and 0  
236 for wild-hatched fish.

237 Background mortality, is expected to depend not just on body size but also  
238 on spawning location and river discharge, as above- and below-dam spawners en-  
239 counter different hydrological conditions during/after spawning and only the for-  
240 mer need to pass the dam on their downriver migration. Mortality associated with  
241 the spawning migration in general, and passing of the dam in particular, may also

242 depend on body size. We thus modelled background mortality hazard rate as:

$$\log(m_{n,i,t}^O) = \log(\mu_n^O) + \beta_{stock}^O * origin_i + \beta_{D,n}^O * discF_t + \beta_{S,n}^O * size_{i,t} + \epsilon_t^O$$

243 Here  $\mu_n^O$  is the median background mortality hazard rate of state  $n$ ,  $discF_t$  is the  
244 average discharge during the fall when many post-spawned trout are expected to  
245 migrate downriver (Oct - Nov), and  $\beta_{D,n}^O$  and  $\beta_{S,n}^O$  are slope parameters for dis-  
246 charge and size effects respectively. Stocking effects ( $\beta_{stock}^O$ ) and temporal random  
247 effects ( $\epsilon_t^O$ ) for background mortality are assumed to be shared across states  $n$ .

248 The probability of using the fish ladder and thus spawning above the dam was  
249 previously found to depend on a complex interplay of individual body size and  
250 river discharge (Haugen et al. 2008). We adopted the basic model structure from  
251 this earlier analysis and extended it by allowing for stocking effects and random  
252 among-year variation such that

$$\begin{aligned} \text{logit}(p_{i,t}) = \text{logit}(\mu^p) + \beta_{stock}^p * origin_i + \beta_D^p * discS_t + \beta_S^p * size_{i,t} + \\ \beta_{DS}^p * discS_t * size_{i,t} + \beta_{SS}^p * size_{i,t}^2 + \epsilon_t^p \end{aligned}$$

253 The discharge covariate used here,  $discS_t$ , differs from the one used above and  
254 represents the average discharge over the summer season when trout undertake  
255 their upriver spawning migration (Jul-Oct).

## 256 **Size imputation under imperfect detection**

257 Using continuous, time-varying individual traits such as body size as covariates in  
258 mark-recapture models is problematic due to imperfect detection: information on  
259 body size will be missing for sampling occasions when an individual is not cap-  
260 tured (Pollock 2002). There are several ways to approach this problem, including  
261 integrated growth models (e.g. Bonner et al. 2010) and inter-/extrapolation using  
262 other available data and/or separate models. Due to the prohibitively large com-  
263 putational demands of an integrated analysis, we here adopted the latter approach  
264 and used a detailed growth model previously developed for the study population  
265 of brown trout (Nater et al. 2018) to impute missing values in the individual size  
266 covariate. Specifically, we re-fitted the growth model of Nater et al. (2018) to an  
267 extended set of growth data from 6,843 individuals spanning the years 1952 to 2003  
268 and used the resulting parameter estimates, plus a correction factor, to calculate  
269 all missing entries in the body size covariate. The imputation procedure, as well  
270 as implementation and results of the growth analysis, are described in detail in SI  
271 S5.

## 272 **Autoregressive reporting rate model**

273 Time-dependent reporting rate  $r_t$  can be expected to vary considerably over a  
274 period of 50 years. To accommodate this, we followed the example of Zhao et al.  
275 (2018) and used a flexible, autoregressive model for time-dependent reporting rates:

$$\text{logit}(r_t) = \text{logit}(r_{t-1}) + \epsilon_t^r$$

276 where  $\epsilon_t^r$  are independently normally distributed random effects. For details on the

277 implementation of the autoregressive model in the context of the overlapping 2-year  
278 time-intervals in our model, we refer readers to the model code (supplementary  
279 file `nimbleDHMM.R`).

## 280 **Implementation with NIMBLE**

281 We implemented the model in a Bayesian framework in NIMBLE (de Valpine  
282 et al. 2017). Building on the work of Turek et al. (2016), we developed a highly ef-  
283 ficient custom likelihood function to greatly reduce MCMC runtimes and memory  
284 load of our analysis (detailed description/evaluation of the custom implementation  
285 and code are provided in SI S2 and `nimbleDHMM.R`). To accommodate the 2-year  
286 interval of our analysis, we split the data into two sets containing only individ-  
287 uals spawning in even years and in odd years respectively. We then formulated  
288 the likelihood for both datasets separately, but analysed them jointly under the  
289 assumption of shared intercept-, slope-, and variance parameters. We used non-  
290 informative priors for all parameters, and made use of NIMBLE’s default set of  
291 samplers. The MCMC algorithm was run for 4 chains of 35,000 iterations, dis-  
292 carding the first 5,000 samples as burn-in. Analyses were run in R 3.5.0 (R Core  
293 Team 2018) using version 0.6-13 of the `nimble` package (NIMBLE Development  
294 Team 2018).

## 295 **MODEL IDENTIFIABILITY AND FIT**

296 With increasing model complexity, and particularly when unobserved states are  
297 included, it is not obvious whether all parameters within a multi-state mark-  
298 recapture model can be estimated (Lebreton and Pradel 2002, Gimenez et al.  
299 2003). Using an extended (hybrid) symbolic method (Cole et al. 2010, Cole 2012,

300 Choquet and Cole 2012) implemented in the computer algebra package Maple, we  
301 looked at intrinsic parameter redundancy in the above described model including  
302 different covariate- and random effect structures. Analyses of intrinsic parame-  
303 ter redundancy, as well as investigation of potential near-redundancy using prior-  
304 posterior overlap (Garrett and Zeger 2000, Gimenez et al. 2009), are described in  
305 detail in SI S3. Maple code is provided as supplementary material.

306 Subsequently, we tested the fit of our model to the data using posterior predic-  
307 tive checks (PPCs, Conn et al. 2018). Specifically, we selected 500 evenly spaced  
308 samples from our posterior distributions and used them to simulate 10 replicate  
309 mark-recapture-recovery datasets per sample. From each simulated dataset, we  
310 then extracted several test statistics representing numbers and size distributions  
311 of recaptured/harvested trout and compared them to the same quantities obtained  
312 from the real data using visual tools and Bayesian p-values. Methodology and re-  
313 sults of the PPCs are described in detail in SI S4.

## 314 Results

### 315 MODEL IDENTIFIABILITY AND FIT

316 We found that in the absence of random effects, the only model structures that  
317 were intrinsically identifiable were those where harvest mortality depended on an  
318 individual time-varying covariate (e.g. body size) and background mortality was  
319 either constant or dependent on an environmental covariate (Table S3.1). However,  
320 all models (irrespective of covariate structure) became identifiable when random  
321 year effects were included on at least harvest hazard or reporting rates (Table S3.1).  
322 Prior-posterior overlaps were below 35% for all parameters except  $r_1$ , indicating



323 no major problems with near-identifiability (SI S3.3).

324 PPCs indicated that overall, the model produced a decent fit to the data, with  
325 Bayesian p-values for the majority of considered data properties falling into an  
326 acceptable range (0.10 - 0.90 for the whole dataset, 0.37 - 0.59 for averages across  
327 marking cohorts, SI S4.3). We found some evidence for lack of fit for a subset  
328 of data properties: mean/median size of individuals recaptured two years after  
329 marking and the number of individuals harvested two to four years after marking.  
330 In both cases, lack of fit was most pronounced in the beginning the time series  
331 (Figures S4.3 & S4.7). Graphical tools illustrated that the model's predictions of  
332 whole size distributions were generally realistic despite Bayesian p-values for size  
333 mean, median, and standard deviation sometimes indicating some degree of lack  
334 of fit (Figure S4.4). For detailed PPC results, refer to SI S4.4.

### 335 **SIZE-DEPENDENT FISH LADDER USAGE**

336 Posterior distributions for all estimated parameters are plotted in Figures S1.2  
337 to S1.10. Numerical results in the following text are displayed as median [95%  
338 credibility interval].

339 The probability of using the fish ladder – and thus spawning above the dam –  
340 depended strongly on individual size and, to a lesser degree, on river discharge (Fig-  
341 ure 3). Intermediate-sized trout (600-700 mm) were most likely to pass the dam  
342 under any discharge conditions. Small to intermediate-sized trout had a higher  
343 probability of using the ladder when river discharge was high, whereas the prob-  
344 ability decreased markedly with size for larger trout irrespective of hydrological  
345 conditions. Ladder usage probability fluctuated considerably over time (Figure 4c)  
346 and was predicted to be lower for stocked (0.476 [0.414, 0.546]) than wild-hatched

347 (0.533 [0.477, 0.592]) trout (Figure S1.11).

#### 348 CAUSE- AND SIZE-DEPENDENT MORTALITY

349 Median mortality hazard rates were estimated at 1.285 [1.090, 1.437] (harvest),  
350 0.084 [0.021, 0.320] (background above-dam), and 0.115 [0.024, 0.540] (background  
351 below-dam) per two years for average-sized trout (670 mm). The resulting probabil-  
352 ities of dying during a 2-year interval due to harvest ( $\Psi_n^H$ ) and due to other causes  
353 ( $\Psi_n^O$ ) were 0.700 [0.600, 0.752] and 0.045 [0.011, 0.173] for above-dam spawners  
354 and 0.692 [0.561, 0.751] and 0.063 [0.013, 0.324] for below-dam spawners. Harvest  
355 hazard rate was predicted to be highest for individuals with a size around 550  
356 mm (Figure 5a). Background mortality hazard rate, while mostly lower than har-  
357 vest hazard rate, decreased with size for above-dam spawners and increased with  
358 size for below-dam spawners (Figure 5a). Consequently, total survival probabil-  
359 ity increased with size for all trout up to 870 mm, but flattened out for larger  
360 below-dam spawners (Figure 5b). River discharge was predicted to increase back-  
361 ground mortality of above-dam spawners only (Figure S1.2). Residual among-year  
362 random variation was substantial in harvest and especially background mortality,  
363 with hazard rates at the 97.5 percentile being 1.28- and 69.67-fold higher than  
364 at the 2.5 percentile respectively, but no temporal trends were evident in either  
365 mortality cause (Figures 4a & 4b).

366 Model results did not support differences in harvest- or background mortality  
367 due to trout origin: hazard ratios of stocked and wild trout were 0.988 [0.886,  
368 1.081] and 0.991 [0.617, 1.601] for harvest and background mortality respectively  
369 (Figure S1.11).

## 370 **TEMPORAL PATTERNS IN REPORTING RATE**

371 A clear decrease in estimates of reporting rate over the 50-year time-period was  
372 evident (Figure 4d), with values exceeding 50% in early years but dropping below  
373 10% towards the end of the time series.

## 374 **Discussion**

375 Individuals can differ greatly in their vulnerability to mortality from different  
376 causes depending on traits like body size and variation in exposure to mortality  
377 risk (e.g. as a consequence of reproductive state or location). Particularly when  
378 some mortality causes are directly linked to human activity, understanding and  
379 accounting for such individual differences in vulnerability can be crucial for man-  
380 agement and conservation. In this study, we combined recent advances in mark-  
381 recapture methodology and Bayesian modelling to investigate factors determining  
382 vulnerability of large migratory brown trout to harvest- and background mortality  
383 in a system heavily impacted by fishing and hydropower production.

## 384 **SIZE-DEPENDENCE OF CAUSE-SPECIFIC MORTALITY**

385 Size-dependent survival is well documented for salmonid fishes like brown trout,  
386 but direction and strength of size effects vary widely across habitats, populations,  
387 years, and life history stages (Carlson et al. 2008, Drenner et al. 2012). Here,  
388 we were able to not only reproduce previous findings of positively size-dependent  
389 survival for the studied trout population (Figure 5b, Haugen et al. 2008), but to  
390 disentangle the underlying contributions from mortality due to harvest and other  
391 causes.

392 Model results supported our initial expectation of non-linear dependence of  
393 vulnerability to harvest and body size : harvest mortality was highest for trout  
394 with sizes of around 550 mm and decreased for both smaller and larger individu-  
395 als (Figure 5a). Bell-shaped selectivity curves such as this are typical for gillnets  
396 (Hamley 1975), which have been commonly used in our study area. The low har-  
397 vest mortality of large trout, however, may seem surprising given that 44% of the  
398 reported harvests were due to angling, which often targets larger fish (Lennox et al.  
399 2017). This may indicate that large trout escape harvest either through their in-  
400 dividual behavior (e.g. different foraging habitats and prey preferences, learning,  
401 Lewin et al. 2006, Arlinghaus et al. 2008) or because cohort selection favours more  
402 cautious fish, allowing them to survive and grow to large sizes (Lennox et al. 2017).

403 Effects of body size on background mortality were predicted to be markedly  
404 different for trout spawning above and below the dam, in particular for larger trout  
405 (Figure 5a). Trout spawning above the dam generally had low background mortal-  
406 ity, possibly indicating limited mortality risk associated with dam passage for adult  
407 fish. Nonetheless, smaller individuals were slightly more vulnerable to dying from  
408 non-harvest causes than larger ones (92% of posterior samples indicated a negative  
409 effect of size on background mortality, Figure S1.2). Two mechanisms that may  
410 be (partially) responsible for this are turbine mortality and energetic costs of dam  
411 passage. During downriver migration after spawning above the dam, trout have to  
412 pass through the floodgates or the turbine shaft to return to the lake. As on many  
413 hydroelectric dams, racks are installed in front of the Hunderfossen power plant's  
414 turbine intake to prevent fish from entering, but small fish may slip through the  
415 grid and subsequently suffer severe injury and die passing the turbine (e.g. Fjeld-  
416 stad et al. 2018). Alternatively, smaller fish may have reduced survival following

417 dam passage due to large energy expenditures resulting from dam passage (on up-  
418 and/or downriver migration) itself (e.g. Roscoe et al. 2011) or as a consequence of  
419 migration delays, particularly if these force individuals to overwinter in the river  
420 (Fjeldstad et al. 2018). Both of these mechanisms are plausible here when also  
421 considering that background mortality of above-dam spawners was predicted to  
422 increase at higher levels of river discharge (Figure S1.2): stronger water flow could  
423 increase both the risk of being swept into the turbine shaft and the energetic costs  
424 of passage.

425 Unlike trout spawning above the dam, trout spawning below the dam were  
426 predicted more vulnerable to background mortality at larger sizes (Figure 5a).  
427 Many mechanisms may be responsible for this; one possibility is related to trout  
428 density downriver of the dam, which can be very high during the spawning season  
429 (Kraabøl 2006) and likely results in elevated levels of stress, aggressive interaction,  
430 and disease transmission. Mortality below the dam could increase with body size  
431 if larger individuals (due to their size, age, or other traits correlated with large  
432 body size) were less able to cope with these challenges and/or increased their  
433 investment into reproduction at the cost of survival under adverse conditions. At  
434 the same time as having higher background mortality below the dam, large trout  
435 were also much more likely to spawn below the dam in the first place (Figure  
436 3), and thus incur the resulting higher mortality. The hydropower dam therefore  
437 has the potential to function as an ecological trap (Schlaepfer et al. 2002) via its  
438 size-selective fish ladder and adverse conditions on downriver spawning grounds,  
439 particularly when considering that the reproductive output of large fish is often  
440 central to the viability of salmonid populations (Jonsson and Jonsson 2011).

441 A second, more practical consequence of the selectivity of the fish ladder is

442 that it substantially limited comparisons of background mortality of above- and  
443 below-dam spawning trout of the same size in the present study. With small and  
444 large trout predominantly spawning above and below the dam respectively, direct  
445 comparisons are only informative for a relatively narrow size range ( $\sim 700 - 850$   
446 mm). Within this range, predictions for above- and below-dam spawners mostly  
447 overlap, with the exception of the largest sizes (Figure 5). Additional data – par-  
448 ticularly on the fates of individuals spawning below the dam – would be necessary  
449 for a more detailed assessment of the interactive effects of hydropower production  
450 and spawning location on mortality and for investigating potential mechanisms  
451 explaining higher mortality large fish below relative to above the dam. What our  
452 approach did allow, however, was an unbiased quantitative comparison of size-  
453 dependent harvest and background mortality: the risk of dying due to fishing was  
454 higher than the risk of dying due to any other cause for almost the entire size  
455 range, suggesting fishing as the main source of adult mortality in this population  
456 (see Kleiven et al. 2016, for a similar result on Atlantic cod).

#### 457 **TEMPORAL VARIATION OVER 50 YEARS**

458 The present analysis extended over half a century, in which the river-lake system  
459 experienced variation in abiotic and biotic factors due to river regulation, lake  
460 restoration, and changes in climate and human activities (Hobæk et al. 2012). It is  
461 therefore unsurprising that we found high among-year variation in cause-specific  
462 mortality and fish ladder usage over the course of the 50-year study period (Figure  
463 4a-c). Background mortality in particular was subject to large fluctuations and  
464 displayed a marked increase during the period 1997-2001 (also visible in overall  
465 mortality and survival, Figure S1.12). This coincides with a documented outbreak

466 of a fungal disease in the study population (*Saprolegnia* spp. infections, possibly  
467 in combination with ulcerative dermal necrosis, Johnsen and Ugedal 2001). This  
468 suggests that disease may be a key driver of changes in adult trout mortality  
469 and has the potential to substantially affect population viability (Hudson et al.  
470 2002). Since freshwater ecosystems are particularly vulnerable to infectious diseases  
471 (Okamura and Feist 2011), studying fungal disease dynamics and how are affected  
472 by harvest, river regulation, and other environmental factors (e.g. temperature,  
473 Letcher et al. 2015) represents an important venue for future research.

474 Unlike cause-specific mortality and ladder usage, which displayed strong fluctu-  
475 ations but no obvious trends, fisher's reporting rate decreased clearly and rapidly  
476 over time: from over 50% of catches being reported in the beginning of the study  
477 period to less than 10% in the last two decades (Figure 4d). Declining fisher en-  
478 gagement over time is a known problem in tagging studies without reward tags  
479 (Piccolo et al. 2012), and highlights the importance of maintaining volunteer par-  
480 ticipation in long-term studies by providing appropriate feedback and keeping up  
481 with technological development of tools and platforms for reporting (Dickinson  
482 et al. 2012).

## 483 **MODEL LIMITATIONS**

484 When analysing long-term ecological data even complex hierarchical models, like  
485 the ones used here, can fail to sufficiently capture heterogeneity (overdispersion)  
486 in the data, resulting in lack of model fit (Richards 2008). PPCs (Conn et al. 2018)  
487 showed that overall our final model fit the data reasonably well, but also revealed  
488 that goodness-of-fit varied substantially across the study period. Particularly the  
489 early years in the data, which correspond to the first two decades following dam

490 construction, were characterized by relatively poorer model fit (Figures S4.3 &  
491 S4.7) Many individuals present during this period were hatched while the river was  
492 still free flowing and prior to implementation of the stocking programme. They may  
493 have experienced environmental conditions vastly different from individuals later  
494 in the time series, possibly resulting in long-lasting cohort effects not uncommon  
495 for salmonid fishes (e.g. Vincenzi et al. 2016). Furthermore, given the profound  
496 changes in harvest practices (gradual shift from gillnet to rod fishing, Aass and  
497 Kraabøl 1999), river regulation (flow regimes, turbine intake grid sizes, etc.), and  
498 disease prevalence during the 50-year study period, it is also not unlikely that  
499 size-dependence of mortality and migratory behavior itself has changed over time.  
500 Overdispersion in our data could thus be related to changes in selection pressures,  
501 something that may warrant attention in future studies.

502 Both parameter estimates and resulting model fit were sensitive to the way we  
503 imputed body size, illustrating that covariate imputation remains the main chal-  
504 lenge of mark-recapture models with continuous individual time-varying covariates  
505 like body size (Pollock 2002, Bonner et al. 2010). Imputing body size using mean  
506 estimates from an externally run growth model, as we have done here, comes with  
507 several limitations. First, data used to estimate growth may not be representative  
508 of the individuals contained in the mark-recapture data. In our case, most data  
509 on growth in the lake pertains to the subadult life stage (prior to maturation) and  
510 resulting growth estimates may thus be less well suited for the mature, spawning  
511 trout that make up the mark-recapture data. Second, growth data is only avail-  
512 able for 53% of individuals and 74% of years (only up to 2003) contained in the  
513 mark-recapture data. Size imputation for a non-random sample of individuals was  
514 thus lacking estimates of year and individual random effects. Finally, and per-



515 haps most importantly, by directly imputing size using mean estimates of growth  
516 model parameters, we omitted all uncertainty in size estimates arising from residual  
517 variation in growth (stochasticity) and parameter uncertainty. Since the reduced  
518 growth model we used matched well with observations (Figure S5.1) and fit of the  
519 mark-recapture-recovery model was overall decent, it is unlikely that the results  
520 we present here are biased to a degree as to invalidate any of the main conclusions.  
521 However, as a result of direct size imputation and likely related lack of model fit,  
522 some of the patterns and effects may be estimated with inflated precision and this  
523 has to be considered when interpreting the presented relationships.

#### 524 **OUTLOOK: DATA INTEGRATION AND POPULATION PERSPECTIVE**

525 The fundamental issues arising from imputing missing individual covariate values  
526 can be addressed through integrated analysis of growth and survival/state transi-  
527 tion processes (Bonner et al. 2010, Letcher et al. 2015), which allows imputation  
528 of the “true” latent body size and estimation of its effects on vital rates without  
529 bias and under full consideration of uncertainty. In our case, not just one but  
530 two distinct data sources provide information on growth: length measurements  
531 from trout captured in the fish ladder (mark-recapture data) and lengths back-  
532 calculated from scale year rings of a subset of marked individuals. This provides a  
533 unique opportunity for integrated analysis of multiple data sets which is likely to  
534 result in more precise estimates of vital rates, more comprehensive understanding  
535 of variation therein, and insights into potential discrepancies among different types  
536 of data (Plard et al. 2019b, Saunders et al. 2019).

537 The large drawback of Bayesian integrated analysis is its high computational  
538 costs, and in the case of the present data and model, computational demands

539 precluded a fully integrated analysis. However, in SI S2 we have shown how imple-  
540 menting the mark-recapture-recovery model with a custom distribution in NIM-  
541 BLE can lead to dramatic increases in computational efficiency (32-times faster  
542 MCMC than with standard JAGS). With the continuing development of both  
543 computational power and flexible, user-friendly MCMC software, large integrated  
544 analyses will likely become more feasible in the future.

545 More efficient computational solutions are also becoming invaluable when look-  
546 ing beyond single vital rates (growth, survival) and towards more holistic models  
547 of population dynamics. Several of the results presented here may have impor-  
548 tant implications for brown trout management but questions such as whether  
549 the high harvest mortality of adult trout has consequences for population via-  
550 bility or whether the dam does indeed function as an ecological trap, can only  
551 be addressed by adopting a population perspective. The framework of integrated  
552 population models (Plard et al. 2019b) in general, and recent extensions for pop-  
553 ulations structured by continuous traits in particular (Plard et al. 2019a), lend  
554 themselves well to the study of these questions for our system and will follow nat-  
555 urally from the integration of growth and survival estimation. Fully integrated,  
556 size-structured population models will further provide new opportunities to study  
557 the joint impacts of harvesting, stocking, habitat alteration, climate change, and  
558 disease dynamics (Plard et al. 2019b) and are thus highly relevant for future stud-  
559 ies aiming to improve understanding and inform management of the trout in lake  
560 Mjøsa and of animal population inhabiting ecosystems heavily impacted by human  
561 activity in general.

## 562 CONCLUSION

563 Multi-state mark-recapture models are powerful tools for estimating and under-  
564 standing survival in animal populations that experience mortality from both natu-  
565 ral and anthropogenic causes (Schaub and Pradel 2004). We used such a model to  
566 disentangle harvest- and background mortality of adult brown trout and showed  
567 that (1) harvest generally outweighed all other sources of mortality and (2) that  
568 vulnerability to both mortality causes was determined by individual differences in  
569 body size and migration pattern (dam passage). The use of a novel hazard rate  
570 parameterization (Ergon et al. 2018) and data from both recaptures and harvest  
571 recoveries allowed to estimate size-dependence and among-year variation in cause-  
572 specific mortality, state transition probabilities, and reporting rate without con-  
573 founding. This framework, including the computationally efficient implementation  
574 of it, is highly applicable to other studies of cause-specific mortality in populations  
575 whose vital rates are strongly affected by continuous traits, and may prove particu-  
576 larly valuable also in the context of estimating correlation among different sources  
577 of mortality. Finally, we illustrated that the use of an appropriate year random  
578 effects structure can be a prerequisite to establishing identifiability of complex  
579 mark-recapture models and is therefore crucial to obtain reliable estimates of vi-  
580 tal rate parameters. In practice, such random effects can only be estimated when  
581 data are collected over a sufficient number of years, emphasizing the importance  
582 of investing in the (continued) collection of individual-based data over long time  
583 periods (Clutton-Brock and Sheldon 2010).

## 584 **Acknowledgements**

585 We thank David Koons and two anonymous reviewers for constructive feedback and  
586 suggestions during the review process. This work was supported by the Research  
587 Council of Norway (project SUSTAIN, 244647/E10). We thank all individuals and  
588 institutions that have been involved in collecting, maintaining, and organizing the  
589 trout data (contributions detailed in Moe et al. 2019), and the Norwegian Water  
590 and Energy Directorate (NVE) for providing river discharge data. Model fitting  
591 was performed on the Abel Cluster (University of Oslo and UNINETT Sigma2  
592 AS).

## 593 **Authors' contributions**

594 CRN, TE, ØL, YV, and LAV conceived the ideas; CRN and TE designed method-  
595 ology; CRN, PA, SJM, and AR prepared the data for analysis; CRN analysed the  
596 data and led the writing of the manuscript; DT developed and tested the cus-  
597 tom likelihood and drafted SI S2. DC designed identifiability analyses and drafted  
598 SI S3. All authors contributed critically to the drafts and gave final approval for  
599 publication.

## 600 **Data accessibility**

601 The complete mark-recapture-recovery and growth data sets will be made available  
602 on the Dryad Digital Repository (DOI to be added) and are documented in Moe  
603 et al. (2019).

## 604 References

- 605 Aas, Ø., A. Klemetsen, S. Einum, and J. Skurdal, 2010. Atlantic salmon ecology.  
606 John Wiley & Sons.
- 607 Aass, P., 1993. Stocking strategy for the rehabilitation of a regulated brown trout  
608 (*Salmo trutta L.*) river. *Regulated Rivers: Research & Management* **8**:135–144.
- 609 Aass, P. and M. Kraabøl, 1999. The exploitation of a migrating brown trout (*Salmo*  
610 *trutta L.*) population; change of fishing methods due to river regulation. *River*  
611 *Research and Applications* **15**:211–219.
- 612 Aass, P., P. S. Nielsen, and Å. Brabrand, 1989. Effects of river regulation on the  
613 structure of a fast-growing brown trout (*Salmo trutta L.*) population. *Regulated*  
614 *Rivers: Research & Management* **3**:255–266.
- 615 Arlinghaus, R., T. Klefoth, A. Kobler, and S. J. Cooke, 2008. Size selectivity, injury,  
616 handling time, and determinants of initial hooking mortality in recreational  
617 angling for northern pike: the influence of type and size of bait. *North American*  
618 *Journal of Fisheries Management* **28**:123–134.
- 619 Bonner, S. J., B. J. Morgan, and R. King, 2010. Continuous covariates in mark-  
620 recapture-recovery analysis: a comparison of methods. *Biometrics* **66**:1256–1265.
- 621 Carlin, B., 1955. Tagging of salmon smolts in the river lagan. *Rep. Inst Freshwat.*  
622 *Res., Drottningholm* **36**:57–74.
- 623 Carlson, S. M., E. M. Olsen, and L. A. Vøllestad, 2008. Seasonal mortality and  
624 the effect of body size: a review and an empirical test using individual data on  
625 brown trout. *Functional Ecology* **22**:663–673.

- 626 Choquet, R. and D. J. Cole, 2012. A hybrid symbolic-numerical method for de-  
627 termining model structure. *Mathematical Biosciences* **236**:117–125.
- 628 Clutton-Brock, T. and B. C. Sheldon, 2010. Individuals and populations: the role  
629 of long-term, individual-based studies of animals in ecology and evolutionary  
630 biology. *Trends in Ecology & Evolution* **25**:562–573.
- 631 Cole, D. J., 2012. Determining parameter redundancy of multi-state mark-  
632 recapture models for sea birds. *Journal of Ornithology* **152**:305–315.
- 633 Cole, D. J., B. J. Morgan, and D. Titterton, 2010. Determining the parametric  
634 structure of models. *Mathematical Biosciences* **228**:16–30.
- 635 Conn, P. B., D. S. Johnson, P. J. Williams, S. R. Melin, and M. B. Hooten, 2018. A  
636 guide to bayesian model checking for ecologists. *Ecological Monographs* **88**:526–  
637 542.
- 638 Cooch, E. G., M. Guillemain, G. S. Boomer, J.-D. Lebreton, and J. D. Nichols,  
639 2014. The effects of harvest on waterfowl populations. *Wildfowl* pages 220–276.
- 640 Cox, D. R., 1972. Regression models and life-tables. *Journal of the Royal Statistical*  
641 *Society: Series B (Methodological)* **34**:187–202.
- 642 De Roos, A. M., L. Persson, and E. McCauley, 2003. The influence of size-  
643 dependent life-history traits on the structure and dynamics of populations and  
644 communities. *Ecology Letters* **6**:473–487.
- 645 de Valpine, P., D. Turek, C. J. Paciorek, C. Anderson-Bergman, D. T. Lang, and  
646 R. Bodik, 2017. Programming with models: writing statistical algorithms for

647 general model structures with nimble. *Journal of Computational and Graphical*  
648 *Statistics* **26**:403–413.

649 Dickinson, J. L., J. Shirk, D. Bonter, R. Bonney, R. L. Crain, J. Martin, T. Phillips,  
650 and K. Purcell, 2012. The current state of citizen science as a tool for ecological  
651 research and public engagement. *Frontiers in Ecology and the Environment*  
652 **10**:291–297.

653 Drenner, S. M., T. D. Clark, C. K. Whitney, E. G. Martins, S. J. Cooke, and  
654 S. G. Hinch, 2012. A synthesis of tagging studies examining the behaviour and  
655 survival of anadromous salmonids in marine environments. *PloS One* **7**:e31311.

656 Ellner, S. P. and M. Rees, 2006. Integral projection models for species with complex  
657 demography. *The American Naturalist* **167**:410–428.

658 Ergon, T., Ø. Borgan, C. R. Nater, and Y. Vindenes, 2018. The utility of mortality  
659 hazard rates in population analyses. *Methods in Ecology and Evolution* **9**:2046–  
660 2056.

661 Fernández-Chacón, A., E. Moland, S. H. Espeland, A. R. Kleiven, and E. M. Olsen,  
662 2017. Causes of mortality in depleted populations of atlantic cod estimated from  
663 multi-event modelling of mark–recapture and recovery data. *Canadian Journal*  
664 *of Fisheries and Aquatic Sciences* **74**:116–126.

665 Fernández-Chacón, A., E. Moland, S. H. Espeland, and E. M. Olsen, 2015. Demo-  
666 graphic effects of full vs. partial protection from harvesting: inference from an  
667 empirical before–after control-impact study on atlantic cod. *Journal of Applied*  
668 *Ecology* **52**:1206–1215.

- 669 Fjeldstad, H.-P., U. Pulg, and T. Forseth, 2018. Safe two-way migration for  
670 salmonids and eel past hydropower structures in Europe: a review and rec-  
671 ommendations for best-practice solutions. *Marine and Freshwater Research*  
672 **69**:1834–1847.
- 673 Garrett, E. S. and S. L. Zeger, 2000. Latent class model diagnosis. *Biometrics*  
674 **56**:1055–1067.
- 675 Gimenez, O., R. Choquet, and J.-D. Lebreton, 2003. Parameter redundancy in  
676 multistate capture-recapture models. *Biometrical Journal: Journal of Mathe-*  
677 *matical Methods in Biosciences* **45**:704–722.
- 678 Gimenez, O., B. J. Morgan, and S. P. Brooks, 2009. Weak identifiability in models  
679 for mark-recapture-recovery data. In *Modeling demographic processes in marked*  
680 *populations*, pages 1055–1067. Springer.
- 681 Hamley, J. M., 1975. Review of gillnet selectivity. *Journal of the Fisheries Board*  
682 *of Canada* **32**:1943–1969.
- 683 Haugen, T. O., P. Aass, N. C. Stenseth, and L. A. Vøllestad, 2008. Changes  
684 in selection and evolutionary responses in migratory brown trout following the  
685 construction of a fish ladder. *Evolutionary Applications* **1**:319–335.
- 686 Hilborn, R. and C. J. Walters, 2013. Quantitative fisheries stock assessment: choice,  
687 dynamics and uncertainty. Springer Science & Business Media.
- 688 Hobæk, A., J. E. Løvik, T. Rohrlack, S. J. Moe, M. Grung, H. Bennion, G. Clarke,  
689 and G. T. Piliposyan, 2012. Eutrophication, recovery and temperature in lake



- 690 Mjøsa: detecting trends with monitoring data and sediment records. *Freshwater*  
691 *Biology* **57**:1998–2014.
- 692 Hudson, P. J., A. Rizzoli, B. T. Grenfell, J. Heesterbeek, and A. P. Dobson, 2002.  
693 Ecology of wildlife diseases .
- 694 Johnsen, B. U. and O. Ugedal, 2001. Soppinfeksjoner (*Saprolegnia* spp.) på lakse-  
695 fisk i norge - statusrapport. *NINA Oppdragsmelding* **716**:1–34.
- 696 Jonsson, B. and N. Jonsson, 2011. Maturation and Spawning. In *Ecology of*  
697 *Atlantic Salmon and Brown Trout*, pages 327–414. Springer Netherlands, Dor-  
698 drecht.
- 699 Kleiven, A. R., A. Fernandez-Chacon, J.-H. Nordahl, E. Moland, S. H. Espeland,  
700 H. Knutsen, and E. M. Olsen, 2016. Harvest pressure on coastal Atlantic cod  
701 (*Gadus morhua*) from recreational fishing relative to commercial fishing assessed  
702 from tag-recovery data. *PLoS One* **11**:e0149595.
- 703 Koons, D. N., R. F. Rockwell, and L. M. Aubry, 2014. Effects of exploitation on  
704 an overabundant species: the lesser snow goose predicament. *Journal of Animal*  
705 *Ecology* **83**:365–374.
- 706 Kraabøl, M., 2006. Gytebiologi hos Hunderørret i Gudbrandsdalslågen nedenfor  
707 Hunderfossen kraftverk. *NINA rapport 217* pages 1–34.
- 708 Lebreton, J.-D., T. Almeras, and R. Pradel, 1999. Competing events, mixtures of  
709 information and multistratum recapture models. *Bird Study* **46**:S39–S46.
- 710 Lebreton, J.-D. and R. Pradel, 2002. Multistate recapture models: modelling in-  
711 complete individual histories. *Journal of Applied Statistics* **29**:353–369.

- 712 Lennox, R. J., J. Alós, R. Arlinghaus, A. Horodysky, T. Klefoth, C. T. Monk, and  
713 S. J. Cooke, 2017. What makes fish vulnerable to capture by hooks? a conceptual  
714 framework and a review of key determinants. *Fish and Fisheries* **18**:986–1010.
- 715 Letcher, B. H., P. Schueller, R. D. Bassar, K. H. Nislow, J. A. Coombs, K. Sakre-  
716 jda, M. Morrissey, D. B. Sigourney, A. R. Whiteley, M. J. O'donnell, et al.,  
717 2015. Robust estimates of environmental effects on population vital rates: an  
718 integrated capture–recapture model of seasonal brook trout growth, survival and  
719 movement in a stream network. *Journal of Animal Ecology* **84**:337–352.
- 720 Lewin, W.-C., R. Arlinghaus, and T. Mehner, 2006. Documented and potential  
721 biological impacts of recreational fishing: insights for management and conser-  
722 vation. *Reviews in Fisheries Science* **14**:305–367.
- 723 Moe, S. J., C. R. Nater, A. Rustadbakken, L. A. Vøllestad, E. Lund, T. Qve-  
724 nild, O. Hegge, and P. Aass, 2019. A 50-year series of mark-recapture data  
725 of large-sized brown trout (*Salmo trutta*) from Lake Mjøsa, Norway. *bioRxiv*  
726 doi:10.1101/544825.
- 727 Nater, C. R., A. Rustadbakken, T. Ergon, Ø. Langangen, S. J. Moe, Y. Vindenes,  
728 L. A. Vøllestad, and P. Aass, 2018. Individual heterogeneity and early life  
729 conditions shape growth in a freshwater top predator. *Ecology* **99**:1011–1017.
- 730 NIMBLE Development Team, 2018. NIMBLE: MCMC, particle filtering, and pro-  
731 grammable hierarchical modeling. R package version 0.6-13.
- 732 Okamura, B. and S. W. Feist, 2011. Emerging diseases in freshwater systems.  
733 *Freshwater Biology* **56**:627–637.

- 734 Piccolo, J. J., J. R. Norrgård, L. A. Greenberg, M. Schmitz, and E. Bergman, 2012.  
735 Conservation of endemic landlocked salmonids in regulated rivers: a case-study  
736 from lake Vänern, Sweden. *Fish and Fisheries* **13**:418–433.
- 737 Plard, F., R. Fay, M. Kéry, A. Cohas, and M. Schaub, 2019b. Integrated population  
738 models: powerful methods to embed individual processes in population dynamics  
739 models. *Ecology* page e02715.
- 740 Plard, F., D. Turek, M. U. Gruebler, and M. Schaub, 2019a. IPM<sup>2</sup>: Toward better  
741 understanding and forecasting of population dynamics. *Ecological Monographs*  
742 **89**:e01364.
- 743 Pollock, K. H., 2002. The use of auxiliary variables in capture-recapture modelling:  
744 an overview. *Journal of Applied Statistics* **29**:85–102.
- 745 Quinn, T. J., 2003. Ruminations on the development and future of population  
746 dynamics models in fisheries. *Natural Resource Modeling* **16**:341–392.
- 747 R Core Team, 2018. R: A Language and Environment for Statistical Computing.  
748 R Foundation for Statistical Computing, Vienna, Austria.
- 749 Richards, S. A., 2008. Dealing with overdispersed count data in applied ecology.  
750 *Journal of Applied Ecology* **45**:218–227.
- 751 Ronget, V., M. Garratt, J.-F. Lemaître, and J.-M. Gaillard, 2017. The ‘Evo-Demo’  
752 implications of condition-dependent mortality. *Trends in Ecology & Evolution*  
753 **32**:909–921.
- 754 Roscoe, D., S. Hinch, S. Cooke, and D. Patterson, 2011. Fishway passage and

- 755 post-passage mortality of up-river migrating sockeye salmon in the Seton River,  
756 British Columbia. *River Research and Applications* **27**:693–705.
- 757 Sæther, B.-E. and Ø. Bakke, 2000. Avian life history variation and contribution  
758 of demographic traits to the population growth rate. *Ecology* **81**:642–653.
- 759 Saunders, S. P., M. T. Farr, A. D. Wright, C. A. Bahlai, J. W. Ribeiro Jr, S. Ross-  
760 man, A. L. Sussman, T. W. Arnold, and E. F. Zipkin, 2019. Disentangling data  
761 discrepancies with integrated population models. *Ecology* page e02714.
- 762 Schaub, M. and R. Pradel, 2004. Assessing the relative importance of different  
763 sources of mortality from recoveries of marked animals. *Ecology* **85**:930–938.
- 764 Schlaepfer, M. A., M. C. Runge, and P. W. Sherman, 2002. Ecological and evolu-  
765 tionary traps. *Trends in Ecology & Evolution* **17**:474–480.
- 766 Servanty, S., R. Choquet, É. Baubet, S. Brandt, J.-M. Gaillard, M. Schaub,  
767 C. Toïgo, J.-D. Lebreton, M. Buoro, and O. Gimenez, 2010. Assessing whether  
768 mortality is additive using marked animals: a Bayesian state–space modeling  
769 approach. *Ecology* **91**:1916–1923.
- 770 Turek, D., P. de Valpine, and C. J. Paciorek, 2016. Efficient Markov chain Monte  
771 Carlo sampling for hierarchical hidden Markov models. *Environmental and Eco-  
772 logical Statistics* **23**:549–564.
- 773 Vincenzi, S., M. Mangel, D. Jesensek, J. C. Garza, and A. J. Crivelli, 2016. Within-  
774 and among-population variation in vital rates and population dynamics in a  
775 variable environment. *Ecological Applications* **26**:2086–2102.

776 Vindenes, Y. and Ø. Langangen, 2015. Individual heterogeneity in life histories  
777 and eco-evolutionary dynamics. *Ecology Letters* **18**:417–432.

778 Williams, B. K., J. D. Nichols, and M. J. Conroy, 2002. Analysis and management  
779 of animal populations. Academic Press.

780 Zhao, Q., G. S. Boomer, and W. L. Kendall, 2018. The non-linear, interactive  
781 effects of population density and climate drive the geographical patterns of wa-  
782 terfowl survival. *Biological Conservation* **221**:1–9.

## 783 Supporting information

784 The following supporting information is available for this publication: Appendices  
785 S1 - S6.

786 **Figures**

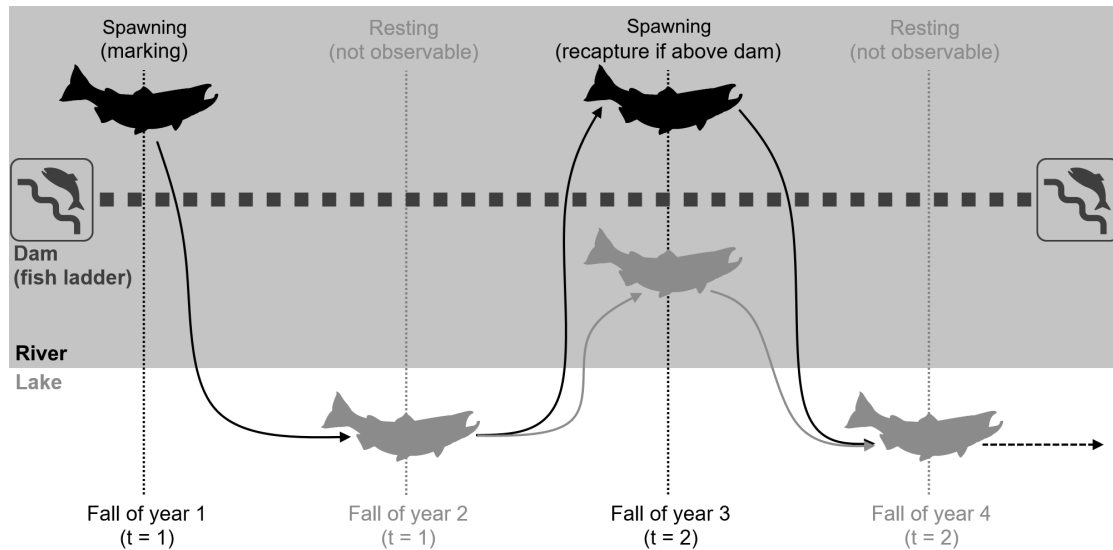

Figure 1: Illustration of the biennial spawning cycle and mark-recapture scheme of the studied trout population. All individuals are marked in the fish ladder while passing the dam on an upriver spawning migration. Two years later they may be recaptured on the next spawning migration, but only if they pass the fish ladder to spawn above the dam (if they spawn below the dam, they are unobservable). Trout remain in the lake and are unobservable during non-spawning years.

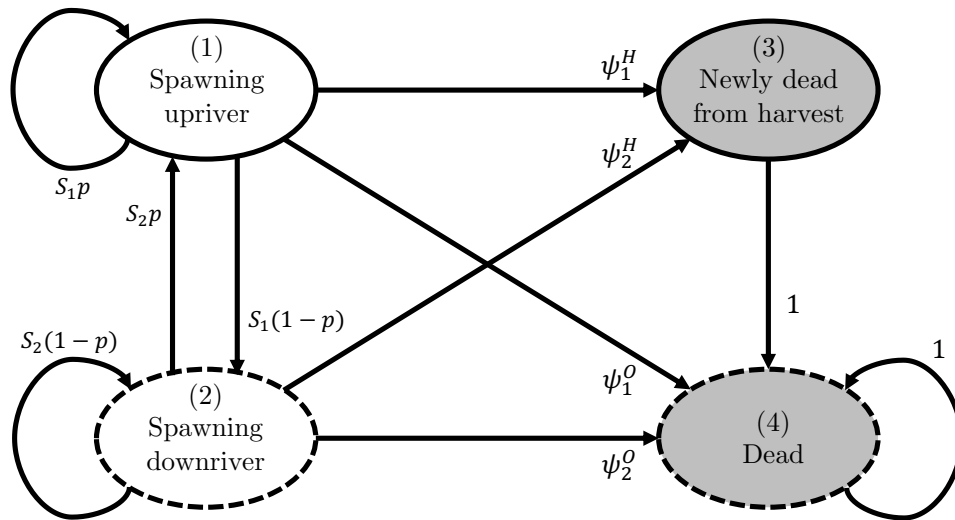

Figure 2: Design of the trout mark-recapture-recovery model (transitions on two-year intervals). White states are alive, grey states are dead. Solid borders indicate states that are at least partially observable, whereas dashed borders indicate unobservable states.  $S_n$  = survival probabilities.  $\psi_n^H / \psi_n^O$  = harvest / background mortality probabilities (where  $n$  indicates the state).  $p$  = ladder usage probability. Indices for individual  $i$  and time  $t$  are omitted here for simplicity.

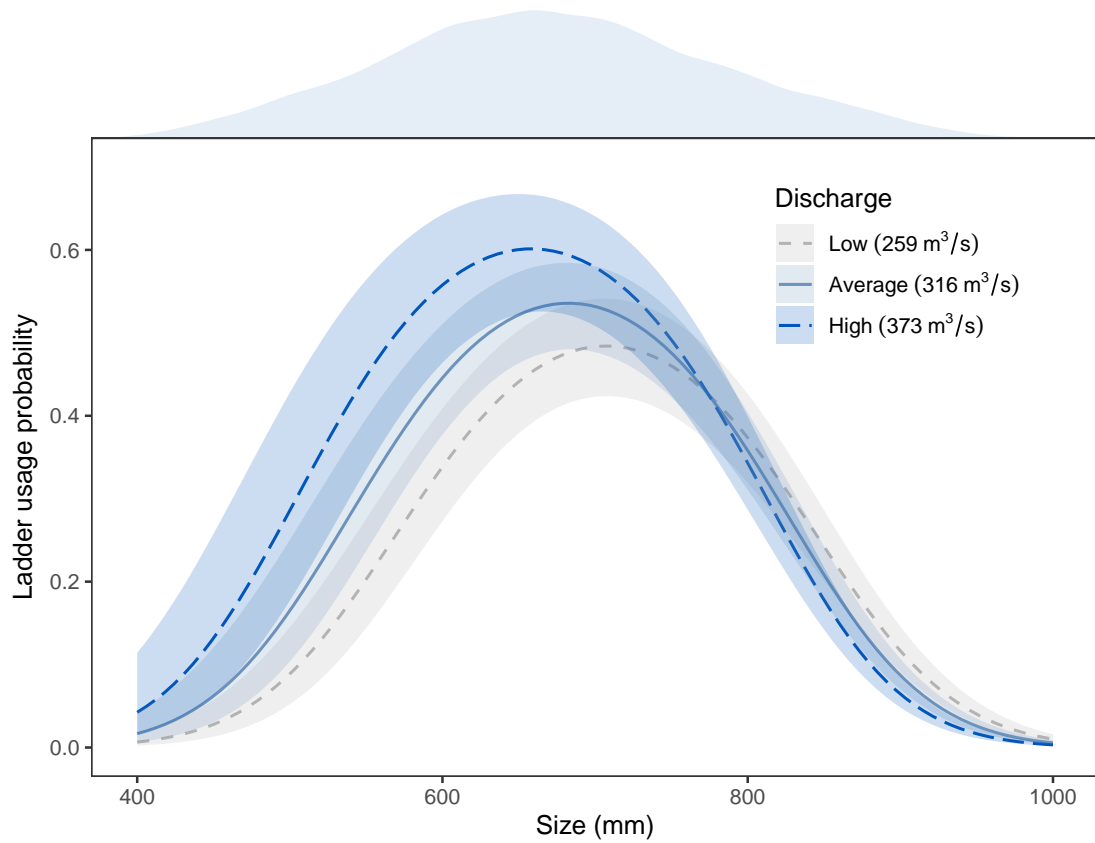

Figure 3: Predictions of the effects of body size on ladder usage probability at different levels of river discharge. Grey, dashed = low discharge (mean – SD). Grey-blue, solid = average discharge (mean). Blue, longdashed = high discharge (mean + SD). Lines represent median prediction, ribbons indicate 95% credibility intervals. The blue density kernel above the plot visualizes the size distribution of trout caught in the ladder (data).



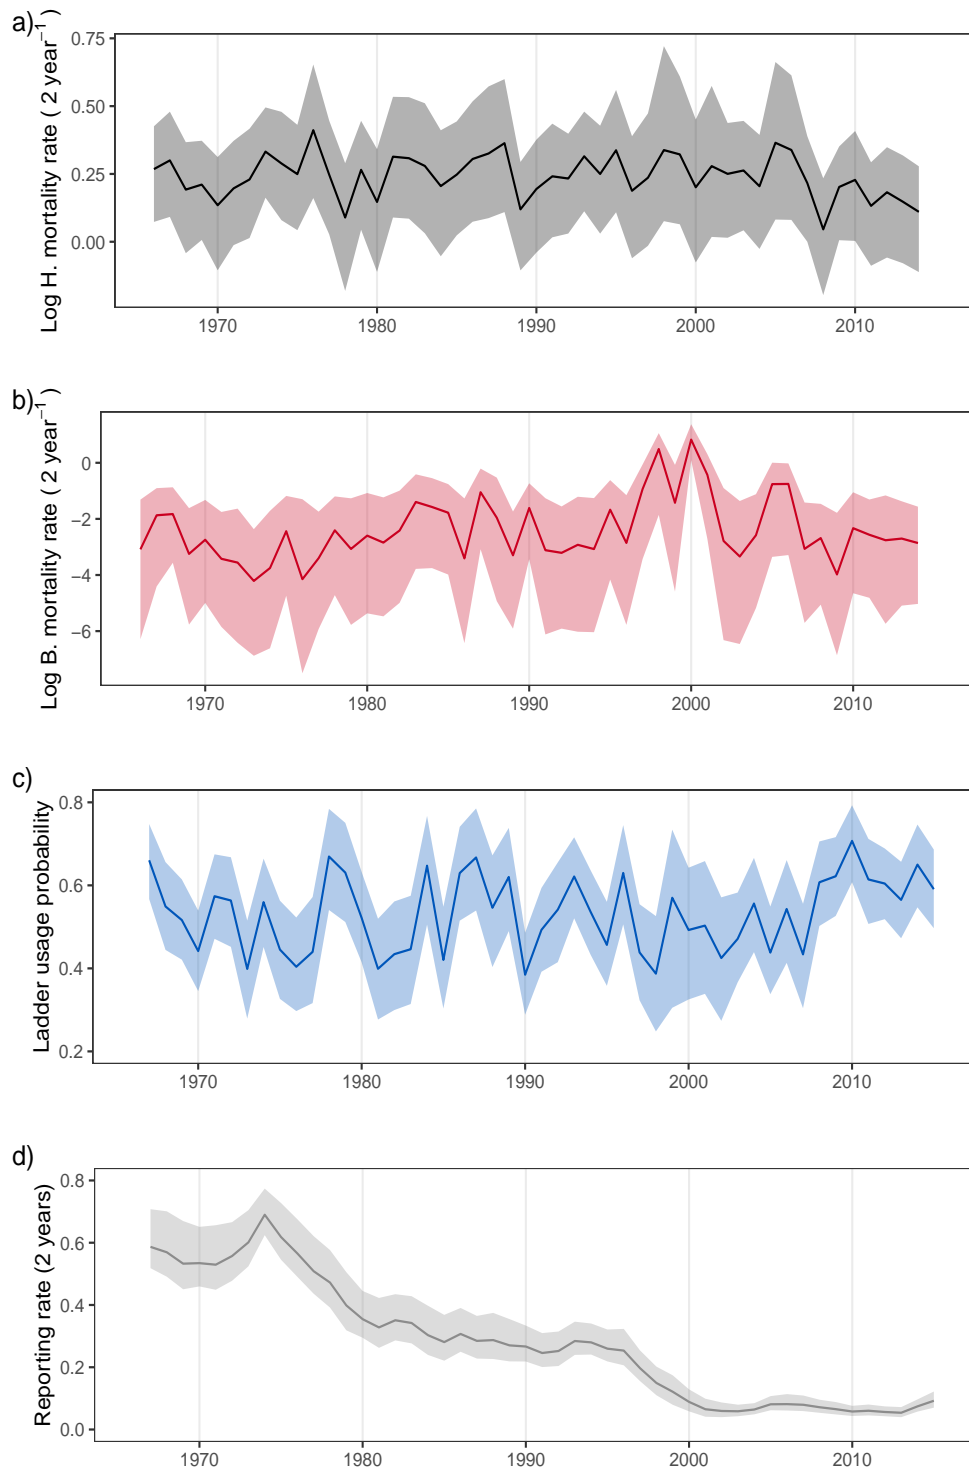

Figure 4: Estimates for time-dependent a) log harvest hazard rate, b) log background mortality hazard rate (above-dam spawners), c) ladder usage probability, and d) reporting rate (calculated using random variation and discharge effects). Lines represent median predictions, ribbons indicate 95% credibility intervals.

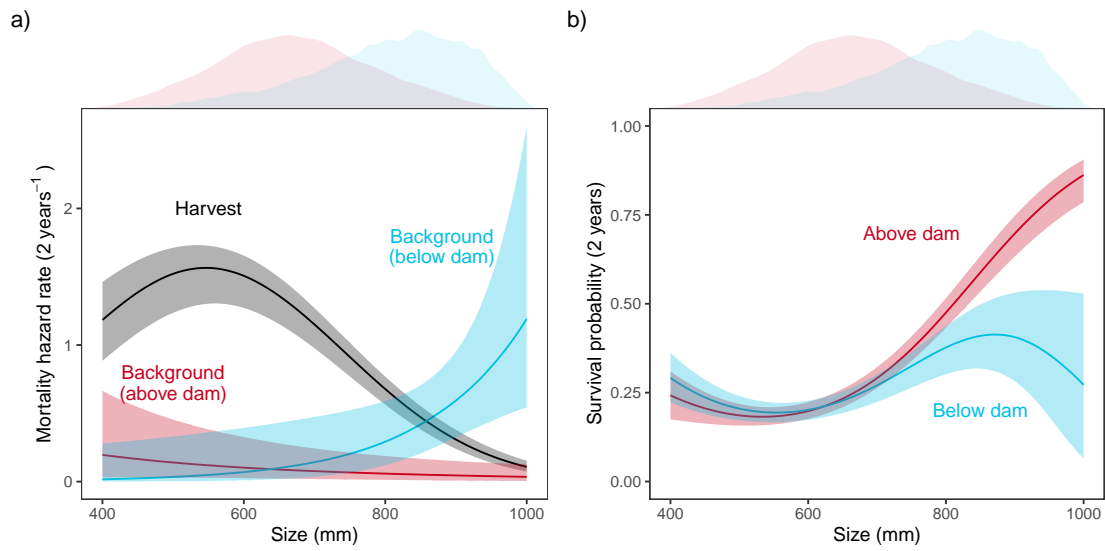

Figure 5: Predictions of the effects of body size on a) harvest and background mortality hazard rates and b) survival probabilities (under consideration of both mortality sources). Red and blue curves apply to individuals that have last spawned above and below the dam respectively. The black curve (harvest) applies to all individuals irrespective of their last spawning location. Lines represent median predictions, ribbons indicate 95% credibility intervals. Density kernels above the panels illustrate the informative data range: red = size distribution of individuals captured in the fish ladder (above-dam spawners, raw data), blue = simulated size distribution of unobservable below-dam spawners.
